# Supplementary material
Source: PubMed Central journal article supplement (PMC9869766)
Supplement: NIHMS1831519-supplement-Supl_Data.pdf [file NIHMS1831519-supplement-Supl_Data.pdf]

## Data capture

Clinical development times (as shown in Supplementary Figure 1) were manually curated from public data sources for each innovative drug approval from 2010 through 2020.

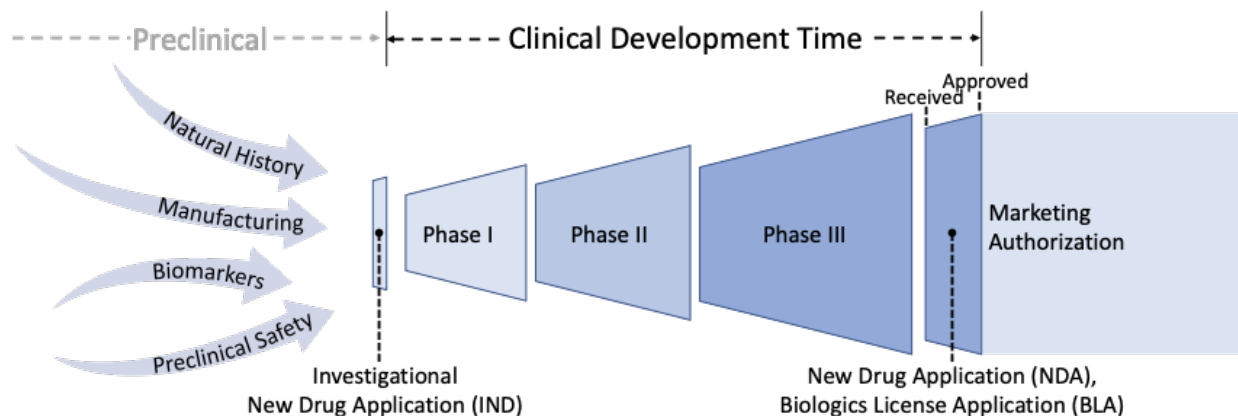

**Supplementary Figure 1 | The clinical development time for a new drug covers the period between the start of clinical testing and marketing authorization.**

The FDA publishes investigational new drug application (IND) effective dates in the Federal Register as part of its determination of regulatory review period for purposes of patent extension as well as in the drug approval package summary review documents provided at Drugs@FDA. Clinical testing typically proceeds 30 days after IND submission and an initial review by the FDA. Some drug approval packages refer to an IND being ‘opened’ and it is unclear if this refers to its submission date or the date it became effective; these dates were used without alteration. When multiple INDs were opened by a sponsor for the same drug, we use the earliest effective date to mark the start of clinical development. Fixed dose combination products often have one IND for the combination product and an earlier IND for a single active ingredient drug. Likewise, some sponsors submit multiple INDs for the same drug in different indications. The FDA inconsistently publishes the effective dates of predecessor INDs in these cases. Also, when multiple new molecular entities are included into a single product (BLA 125462 for BAT/Botulism Antitoxin Heptavalent; NDA 206619 for VIEKIRA PAK containing ombitasvir, paritaprevir and dasabuvir; NDA 209394 for MAVYRET containing glecaprevir and pibrentasvir; NDA 208261 for ZEPATIER containing elbasvir and grazoprevir; NDA 203100 for STRIBILD containing elvitegravir and cobicistat; BLA 761169 for INMAZEB containing atoltivimab, maffivimab and odesivimab), we used the date of the first new molecular entity to enter human clinical testing. Finally, where the initial clinical characterization of a drug is done outside the US, the dates of initial clinical development may precede the effective dates of an IND. Such cases are usually described in the regulatory background section of the summary clinical review or sometimes in the chemistry, administrative or other sections of the drug approval package. The trials themselves are often described in detail within the drug approval package, especially the clinical pharmacology summary review. Where dates of such early trials are not available or substantial international development and/or marketing of a drug preceded US development, no clinical development start date is provided. Where dates of such early trials are provided within the drug

approval package, they were used as the clinical development start date. Where the trial can be cross-referenced by trial identifier or other trial descriptors including title, number enrolled, and study location, we used trial start dates provided by [clinicaltrials.gov](https://clinicaltrials.gov), other regulatory filings including at the Japanese Pharmaceuticals and Medical Devices Agency, European Medicines Agency, Securities and Exchange Commission, and occasionally company press releases, trial databases and peer-reviewed literature.

Data on NDA and BLA receipt dates (date the first and complete marketing application was received by the agency) and utilization of FDA's expedited development mechanisms (fast track designation, breakthrough designation, accelerated approval, priority review and priority review voucher) and orphan product designation were provided by [FDA/CDER](#). Additional data on innovative drugs approved by the Center for Biologics Evaluation and Research (CBER) were [gathered separately](#). 13 new vaccine products approved between 2010 and 2020 were excluded from the present study.

Non-first-cycle products are those that required a resubmission to address the agency's review concerns including manufacturing, safety or efficacy deficiencies in the original new drug application submission. This does not include products that submitted amendments and may have had review target dates adjusted accordingly, nor does it include cases where a different new drug application for the same product has been earlier submitted and not approved (for example NDA 206-334 for oritavancin which has previously been the subject of the withdrawn NDA 22-153 or NDA 211-996 for tafamidis meglumine which had previously been the subject of NDA 202-737).

## **Development and review time linear regression**

For each innovative drug, additional details on its clinical development were captured including whether the program benefited from any FDA expedited development mechanisms. FDA expedited development mechanisms include: fast-track designation, breakthrough designation, accelerated approval, and priority review status. In addition, this study recorded whether the product had an FDA orphan product designation, whether the product approval required multiple review cycles, whether the approved product contained a black box warning, whether the product benefited from Animal Rule approval, and finally whether the product was a diagnostic imaging agent.

Two linear regression models were created in Python 3.8.5 with [statsmodels](#) ordinary least squares(OLS) method of linear regression using clinical development time as well as review time (the number of days elapsed between the receipt of a new drug application or biologics license application and product approval) for the matrix of factors outlined above.

Clinical Development Time Regression Results

|                          |                              |                            |          |
|--------------------------|------------------------------|----------------------------|----------|
| <b>Dep. Variable:</b>    | Days In Clinical Development | <b>R-squared:</b>          | 0.079    |
| <b>Model:</b>            | OLS                          | <b>Adj. R-squared:</b>     | 0.058    |
| <b>Method:</b>           | Least Squares                | <b>F-statistic:</b>        | 3.783    |
| <b>Date:</b>             | Sat, 09 Oct 2021             | <b>Prob (F-statistic):</b> | 0.000136 |
| <b>Time:</b>             | 11:29:49                     | <b>Log-Likelihood:</b>     | -3586.4  |
| <b>No. Observations:</b> | 405                          | <b>AIC:</b>                | 7193.    |
| <b>Df Residuals:</b>     | 395                          | <b>BIC:</b>                | 7233.    |
| <b>Df Model:</b>         | 9                            |                            |          |

**Covariance Type:** nonrobust

|                     | <b>coef</b> | <b>std err</b> | <b>t</b> | <b>P&gt; t </b> | <b>[0.025</b> | <b>0.975]</b> |
|---------------------|-------------|----------------|----------|-----------------|---------------|---------------|
| <b>const</b>        | 3315.5883   | 167.378        | 19.809   | 0.000           | 2986.526      | 3644.651      |
| <b>fastTrack</b>    | -43.9435    | 198.619        | -0.221   | 0.825           | -434.427      | 346.540       |
| <b>breakthrough</b> | -479.4227   | 241.053        | -1.989   | 0.047           | -953.331      | -5.515        |
| <b>priority</b>     | 76.4560     | 224.695        | 0.340    | 0.734           | -365.291      | 518.203       |
| <b>accelerated</b>  | -1100.4155  | 273.289        | -4.027   | 0.000           | -1637.699     | -563.132      |
| <b>orphan</b>       | 552.4105    | 205.867        | 2.683    | 0.008           | 147.679       | 957.142       |

|                          |           |                          |          |       |           |          |
|--------------------------|-----------|--------------------------|----------|-------|-----------|----------|
| <b>nonFirstCycle</b>     | 642.5630  | 259.620                  | 2.475    | 0.014 | 132.154   | 1152.972 |
| <b>blackBox</b>          | -10.6366  | 208.115                  | -0.051   | 0.959 | -419.788  | 398.514  |
| <b>diagnosticImaging</b> | 60.8467   | 558.515                  | 0.109    | 0.913 | -1037.186 | 1158.880 |
| <b>animalRule</b>        | -480.5828 | 788.514                  | -0.609   | 0.543 | -2030.792 | 1069.626 |
| <b>Omnibus:</b>          | 229.732   | <b>Durbin-Watson:</b>    | 1.905    |       |           |          |
| <b>Prob(Omnibus):</b>    | 0.000     | <b>Jarque-Bera (JB):</b> | 2089.603 |       |           |          |
| <b>Skew:</b>             | 2.273     | <b>Prob(JB):</b>         | 0.00     |       |           |          |
| <b>Kurtosis:</b>         | 13.157    | <b>Cond. No.</b>         | 13.2     |       |           |          |

Note: Standard Errors assume that the covariance matrix of the errors is correctly specified

|                                |                  |                            |          |
|--------------------------------|------------------|----------------------------|----------|
| Review Time Regression Results |                  |                            |          |
| <b>Dep. Variable:</b>          | Days In Review   | <b>R-squared:</b>          | 0.476    |
| <b>Model:</b>                  | OLS              | <b>Adj. R-squared:</b>     | 0.464    |
| <b>Method:</b>                 | Least Squares    | <b>F-statistic:</b>        | 39.90    |
| <b>Date:</b>                   | Sat, 09 Oct 2021 | <b>Prob (F-statistic):</b> | 2.50e-50 |
| <b>Time:</b>                   | 11:29:50         | <b>Log-Likelihood:</b>     | -2914.1  |
| <b>No. Observations:</b>       | 405              | <b>AIC:</b>                | 5848.    |

|                          |             |                       |          |                 |               |               |
|--------------------------|-------------|-----------------------|----------|-----------------|---------------|---------------|
| <b>Df Residuals:</b>     | 395         | <b>BIC:</b>           | 5888.    |                 |               |               |
| <b>Df Model:</b>         | 9           |                       |          |                 |               |               |
| <b>Covariance Type:</b>  | nonrobust   |                       |          |                 |               |               |
|                          | <b>coef</b> | <b>std err</b>        | <b>t</b> | <b>P&gt; t </b> | <b>[0.025</b> | <b>0.975]</b> |
| <b>const</b>             | 379.2022    | 31.825                | 11.915   | 0.000           | 316.634       | 441.770       |
| <b>fastTrack</b>         | 6.5113      | 37.766                | 0.172    | 0.863           | -67.736       | 80.758        |
| <b>breakthrough</b>      | -18.4881    | 45.834                | -0.403   | 0.687           | -108.597      | 71.621        |
| <b>priority</b>          | -102.8700   | 42.724                | -2.408   | 0.017           | -186.864      | -18.876       |
| <b>accelerated</b>       | -60.8675    | 51.963                | -1.171   | 0.242           | -163.027      | 41.292        |
| <b>orphan</b>            | -19.0294    | 39.144                | -0.486   | 0.627           | -95.985       | 57.927        |
| <b>nonFirstCycle</b>     | 828.7822    | 49.364                | 16.789   | 0.000           | 731.733       | 925.832       |
| <b>blackBox</b>          | -72.7698    | 39.571                | -1.839   | 0.067           | -150.566      | 5.027         |
| <b>diagnosticImaging</b> | -114.2320   | 106.196               | -1.076   | 0.283           | -323.013      | 94.549        |
| <b>animalRule</b>        | 57.6139     | 149.929               | 0.384    | 0.701           | -237.144      | 352.372       |
| <b>Omnibus:</b>          | 484.854     | <b>Durbin-Watson:</b> | 1.970    |                 |               |               |

Prob(Omnibus): 0.000 Jarque-Bera (JB): 39265.195

Skew: 5.524 Prob(JB): 0.00

Kurtosis: 49.955 Cond. No. 13.2

Note: Standard Errors assume that the covariance matrix of the errors is correctly specified.

## Therapeutic class and molecule type one-way ANOVA

To determine where there were significant differences between clinical development times for different therapeutic classes or different molecule types, we applied one-way ANOVA testing. We excluded therapeutic and molecule type classes with few observations in the dataset. A full listing of included classes is found below.

### SUMMARY

| <i>Groups</i> | <i>Count</i> | <i>Sum</i> | <i>Average</i> | <i>Variance</i> |
|---------------|--------------|------------|----------------|-----------------|
| Antiviral     | 26           | 66209      | 2546.5         | 1806809.38      |
| Oncology      | 126          | 398890     | 3165.79365     | 3187246.57      |
| Endocrinology | 51           | 177734     | 3484.98039     | 2819988.58      |
| Respiratory   | 19           | 78966      | 4156.10526     | 9955810.43      |
| Neurology     | 63           | 217442     | 3451.46032     | 2570470.41      |
| Hematology    | 24           | 92380      | 3849.16667     | 4456158.84      |
| Antibacterial | 24           | 87696      | 3654           | 1628162.35      |

### ANOVA

| <i>Source of Variation</i> | <i>SS</i>  | <i>df</i> | <i>MS</i>  | <i>F</i>   | <i>P-value</i> | <i>F crit</i> |
|----------------------------|------------|-----------|------------|------------|----------------|---------------|
| Between Groups             | 43140782.6 | 6         | 7190130.44 | 2.20487969 | 0.04229512     | 2.12642386    |

Within Groups 1063088625 326 3261008.05

Total 1106229408 332

---

#### SUMMARY

| <i>Groups</i>   | <i>Count</i> | <i>Sum</i> | <i>Average</i> | <i>Variance</i> |
|-----------------|--------------|------------|----------------|-----------------|
| Antibody        | 74           | 240414     | 3248.83784     | 1911501.7       |
| Enzyme          | 16           | 66144      | 4134           | 13092973.2      |
| Oligonucleotide | 9            | 20366      | 2262.88889     | 280252.611      |
| Peptide         | 26           | 111376     | 4283.69231     | 3224869.5       |
| Polymer         | 5            | 24608      | 4921.6         | 5344241.3       |
| Protein         | 8            | 23488      | 2936           | 2057781.14      |
| Small molecule  | 260          | 862842     | 3318.62308     | 2871695.7       |
| Virus           | 6            | 20051      | 3341.83333     | 1118820.97      |

---

#### ANOVA

| <i>Source of Variation</i> | <i>SS</i>  | <i>df</i> | <i>MS</i>  | <i>F</i>   | <i>P-value</i> | <i>F crit</i> |
|----------------------------|------------|-----------|------------|------------|----------------|---------------|
| Between Groups             | 57246677.6 | 7         | 8178096.81 | 2.68993393 | 0.0098652      | 2.0327123     |
| Within Groups              | 1203942706 | 396       | 3040259.36 |            |                |               |
| Total                      | 1261189383 | 403       |            |            |                |               |

---
