# Supplementary material
Source: PubMed Central journal article supplement (PMC9869766)
Supplement: NIHMS1831519-supplement-Supl_Table.pdf [file NIHMS1831519-supplement-Supl_Table.pdf]

| App No | Product    | NME              | Ingredients | Unit                     | Molecule Therapeutic Class | App Type | IND date   | IND date | App submitted date | App approval date | Days in clinical review | Days in review | First Ophan | Fast Track | Break-through | Accelerated | Non-FDA | First class | Diagnostic | Adrenal |
|--------|------------|------------------|-------------|--------------------------|----------------------------|----------|------------|----------|--------------------|-------------------|-------------------------|----------------|-------------|------------|---------------|-------------|---------|-------------|------------|---------|
| App No | Product    | NME              | Ingredients | Unit                     | Molecule Therapeutic Class | App Type | IND date   | IND date | App submitted date | App approval date | Days in clinical review | Days in review | First Ophan | Fast Track | Break-through | Accelerated | Non-FDA | First class | Diagnostic | Adrenal |
| 20945  | Fetroja    | oxcarbazepine    | 57340M568   | Antibacterial            | small molecule             | MOA      | 12/22/2013 |          | 12/18/2013         | 11/7/2015         | 2428                    | 335            |             | 1          |               |             |         |             |            |         |
| 76136  | Relestat   | lapatinib        | ADG74BALLS  | Hematology               | antibody                   | BLA      | 7/14/2011  |          | 4/4/2010           | 1/18/2010         | 3039                    | 218            | 1           | 1          | 1             |             |         |             |            |         |
| 21223  | Trikata    | efavirenz        | 8RN678480V  | Respiratory              | small molecule             | MOA      | 12/12/2016 |          | 7/19/2016          | 10/27/2016        | 1943                    | 94             | 1           | 1          | 1             |             |         |             |            |         |
| 21180  | Reveo      | isaxitinib       | 7609W4792   | Neurology                | small molecule             | MOA      | 11/1/2006  |          | 10/11/2016         | 10/17/2016        | 4727                    | 365            | 1           |            |               |             |         |             |            |         |
| 20055  | F. H       | fluridone        | 2526R2624   | Neurology                | small molecule             | MOA      | NA         |          | 10/22/2015         | 10/10/2015        | NA                      | 2544           |             |            |               |             |         |             |            |         |
| 21297  | Somescio   | ifamandibine     | OW68W3662   | Dermatology              | small molecule             | MOA      | 10/1/2006  |          | 11/8/2016          | 10/28/2016        | 4763                    | 334            | 1           | 1          | 1             |             |         |             |            |         |
| 76125  | Benev      | incobotulinum    | K523G39H5   | Ophthalmology            | antibody                   | BLA      | 4/20/2011  |          | 3/7/2010           | 10/7/2010         | 1092                    | 242            | 1           |            |               |             |         |             |            |         |
| 21157  | Alidif     | infliximab       | 0188W2908   | Dermatology              | small molecule             | MOA      | 2/3/2011   |          | 10/4/2016          | 10/4/2016         | 3165                    | 365            | 1           |            |               |             |         |             |            |         |
| 21181  | Inviva     | temagatril       | WYD792446   | Gastroenterology         | small molecule             | MOA      | 10/21/2010 |          | 9/12/2016          | 9/12/2016         | 1246                    | 365            |             |            |               |             |         |             |            |         |
| 20275  | Nouriant   | lisdexamfetamine | 2G2L8W714   | Neurology                | small molecule             | MOA      | 7/1/1996   |          | 4/25/2007          | 4/27/2010         | 8457                    | 4507           |             |            |               |             |         |             |            |         |
| 21028  | DOTATOC    | galatium Ga-68   | Y86179VZL   | Oncology                 | small molecule             | MOA      | 7/22/2011  |          | 5/23/2016          | 8/21/2016         | 6624                    | 455            | 1           |            |               |             |         |             |            |         |
| 21467  | Avista     | lefamandibine    | 2100A4386   | Antibacterial            | small molecule             | MOA      | 10/1/2006  |          | 2/10/2016          | 8/26/2016         | 3993                    | 243            | 1           | 1          | 1             |             |         |             |            |         |
| 21237  | Invectis   | fedratinib       | 6119P5036   | Oncology                 | small molecule             | MOA      | 10/24/2007 |          | 1/3/2016           | 8/16/2016         | 4514                    | 225            | 1           | 1          | 1             |             |         |             |            |         |
| 21167  | Rimoc      | upadacitinib     | 48A0N4660   | Rheumatology             | small molecule             | MOA      | 7/1/2012   |          | 12/18/2016         | 8/16/2016         | 3602                    | 241            |             |            |               |             |         |             |            |         |
| 21225  | Rushbro    | entrectinib      | 15G8F04N1   | Oncology                 | small molecule             | MOA      | 2/27/2014  |          | 12/18/2016         | 8/16/2016         | 1995                    | 240            | 1           | 1          | 1             |             |         |             |            |         |
| 21162  | Pretomanid | pretomanid       | 2X013114N   | Antibacterial            | small molecule             | MOA      | 4/28/2005  |          | 12/14/2016         | 8/14/2016         | 5231                    | 243            | 1           | 1          | 1             |             |         |             |            |         |
| 21150  | Mavik      | gabapentin       | 48C3B4MY    | Psychiatry               | small molecule             | MOA      | NA         |          | 12/14/2016         | 8/14/2016         | NA                      | 243            | 1           | 1          | 1             |             |         |             |            |         |
| 21130  | Turalio    | penicillamine    | 6782M3VX    | Oncology                 | small molecule             | MOA      | 4/19/2009  |          | 12/1/2016          | 8/22/2016         | 3636                    | 242            | 1           | 1          | 1             |             |         |             |            |         |
| 21299  | Nubaga     | daridoxifen      | X05UN28C0   | Oncology                 | small molecule             | MOA      | 11/13/2012 |          | 2/26/2016          | 7/30/2016         | 2373                    | 154            | 1           |            |               |             |         |             |            |         |
| 21130  | Acrodex    | formal           | MA10V130    | Neurology                | small molecule             | MOA      | NA         |          | 9/27/2016          | 7/25/2016         | NA                      | 301            |             |            |               |             |         |             |            |         |
| 21219  | Receptin   | relatamab        | Y1M4Z3H6    | Antibacterial            | small molecule             | MOA      | 11/3/2010  |          | 11/16/2016         | 7/16/2016         | 3328                    | 242            | 1           | 1          | 1             |             |         |             |            |         |
| 21136  | Opzivo     | velipristin      | 117Z790F    | Oncology                 | small molecule             | MOA      | 4/8/2012   |          | 8/6/2016           | 7/18/2016         | 2581                    | 311            | 1           | 1          | 1             |             |         |             |            |         |
| 21057  | Vylese     | bremelanotide    | PV207465F   | Endocrinology            | small molecule             | MOA      | 12/22/2011 |          | 8/23/2016          | 8/21/2016         | 6719                    | 455            | 1           |            |               |             |         |             |            |         |
| 76131  | Polyv      | polizumab        | K56V0462    | Oncology                 | antibody                   | BLA      | 1/7/2011   |          | 12/10/2016         | 4/10/2016         | 3076                    | 173            | 1           | 1          | 1             |             |         |             |            |         |
| 21226  | Pirar      | apilixib         | 08W5N2230   | Oncology                 | small molecule             | MOA      | 10/5/2010  |          | 12/18/2016         | 1/24/2016         | 3153                    | 157            | 1           |            |               |             |         |             |            |         |
| 12664  | Zelmac     | metaxalone       | MU13U18UV   | Neurology                | small molecule             | MOA      | 8/8/2013   |          | 10/7/2016          | 1/28/2016         | 3151                    | 215            | 1           | 1          | 1             |             |         |             |            |         |
| 21196  | Vendrel    | infliximab       | 217298A14   | Cardiology               | small molecule             | MOA      | 8/19/2005  |          | 11/2/2016          | 5/13/2016         | 5095                    | 182            | 1           | 1          | 1             |             |         |             |            |         |
| 76135  | Sparix     | risankimab       | 90Z0S087    | Dermatology              | antibody                   | BLA      | 2/28/2012  |          | 4/23/2016          | 4/23/2016         | 2611                    | 365            |             |            |               |             |         |             |            |         |
| 21018  | Bahama     | erdafitinib      | 8M6378M4V   | Oncology                 | small molecule             | MOA      | 8/22/2013  |          | 9/18/2016          | 4/13/2016         | 2307                    | 206            | 1           | 1          | 1             |             |         |             |            |         |
| 76102  | Ewenty     | omecaspimab      | 3YF22003    | Oncology                 | antibody                   | BLA      | 11/1/2006  |          | 7/19/2016          | 4/20/2016         | 4542                    | 994            |             |            |               |             |         |             |            |         |
| 20084  | Mazint     | oprelvekin       | 8R46R201    | Neurology                | small molecule             | MOA      | 11/5/2006  |          | 7/26/2016          | 3/26/2016         | 4575                    | 243            |             |            |               |             |         |             |            |         |
| 21120  | Sensil     | sativite         | 939V70316   | Neurology                | small molecule             | MOA      | 6/1/2009   |          | 12/20/2016         | 3/29/2016         | 3616                    | 455            | 1           |            |               |             |         |             |            |         |
| 21171  | Zelmac     | metaxalone       | 53K2509V    | Neurology                | small molecule             | MOA      | 11/31/2014 |          | 4/19/2016          | 4/19/2016         | 1492                    | 334            | 1           | 1          | 1             |             |         |             |            |         |
| 20071  | Egatin     | trifluoperazine  | 47848030    | Other Infectious Disease | small molecule             | MOA      | NA         |          | 6/14/2016          | 1/13/2016         | NA                      | 244            | 1           | 1          | 1             |             |         |             |            |         |
| 76112  | Gabta      | gabacitrin       | 282748676   | Hematology               | antibody                   | BLA      | 7/2/2007   |          | 6/6/2016           | 2/6/2016          | 4237                    | 245            | 1           | 1          | 1             |             |         |             |            |         |
